# Supplementary material for: Sucrose accumulation in sweet sorghum stems occurs by apoplasmic phloem unloading and does not involve differential Sucrose transporter expression
Source: PubMed Central journal article supplement (PMC4518677; doi:10.1186/s12870-015-0572-8), 2015-07-30
Supplement: 12870_2015_572_MOESM1_ESM.pdf [file 12870_2015_572_MOESM1_ESM.pdf]

**Additional file 1: Table S1. Morphological parameters of field-grown Macia and Wray plants measured at different days after planting (DAP).**

|                          | 43 DAP    |           |           | 77 DAP    |           |           | 82 DAP    |           |           | 91 DAP    |           |           |
|--------------------------|-----------|-----------|-----------|-----------|-----------|-----------|-----------|-----------|-----------|-----------|-----------|-----------|
|                          | Macia     | Wray      |           | Macia     | Wray      |           | Macia     | Wray      |           | Macia     | Wray      |           |
| MS LN                    | 10.2 ±0.2 | 10.6 ±0.2 | <i>ns</i> | 18.6 ±0.2 | 22.2 ±0.6 | <b>c</b>  | 19 ±0.5   | 22.8 ±0.5 | <b>c</b>  | 19.4 ±0.2 | 22.2 ±0.4 | <b>c</b>  |
| MS LA (cm <sup>2</sup> ) | 872 ±83   | 664 ±47   | <i>ns</i> | 4442 ±79  | 4827 ±269 | <i>ns</i> | 4434 ±131 | 4758 ±253 | <i>ns</i> | 4578 ±156 | 4858 ±78  | <i>ns</i> |
| tLL (cm)                 | 37.7 ±1.1 | 43.1 ±1   | <b>b</b>  | 48 ±2.1   | 20.8 ±1.1 | <b>c</b>  | 48.1 ±2.7 | 22 ±1.9   | <b>c</b>  | 43.3 ±2.7 | 23 ±2.1   | <b>c</b>  |
| mLL (cm)                 | 33.9 ±1.7 | 33.3 ±1.5 | <i>ns</i> | 53.9 ±1.5 | 83.7 ±3.9 | <b>c</b>  | 55.5 ±1.4 | 80.4 ±4   | <b>c</b>  | 62.3 ±3   | 83 ±2.4   | <b>c</b>  |
| bLL (cm)                 | 21.1 ±0.4 | 16.2 ±0.8 | <b>c</b>  | 33.9 ±1.7 | 43.5 ±1.1 | <b>b</b>  | 35.8 ±1.2 | 39.2 ±2   | <i>ns</i> | 34.6 ±2.1 | 44.1 ±2.6 | <b>a</b>  |
| tLW (cm)                 | 6.5 ±0.3  | 5.5 ±0.1  | <b>b</b>  | 8.9 ±0.3  | 2.1 ±0.2  | <b>c</b>  | 8.6 ±0.5  | 2.9 ±0.2  | <b>c</b>  | 7 ±0.2    | 2.6 ±0.2  | <b>c</b>  |
| mLW (cm)                 | 4.9 ±0.2  | 3.6 ±0.3  | <b>b</b>  | 9.2 ±0.2  | 6.4 ±0.2  | <b>c</b>  | 8.9 ±0.3  | 6.7 ±0.5  | <b>c</b>  | 8.4 ±0.2  | 6.6 ±0.2  | <b>c</b>  |
| bLW (cm)                 | 1.7 ±0.1  | 1.9 ±0.3  | <i>ns</i> | 5.2 ±0.2  | 4.7 ±0.3  | <i>ns</i> | 5.3 ±0.1  | 4.6 ±0.3  | <b>a</b>  | 5.4 ±0.3  | 5 ±0.4    | <i>ns</i> |
| TN                       | 1.2 ±0.2  | 3.8 ±0.4  | <b>c</b>  | 1.2 ±0.2  | 4.8 ±0.6  | <b>c</b>  | 1 ±0      | 4.3 ±0.3  | <b>c</b>  | 1 ±0      | 3.4 ±0.2  | <b>c</b>  |
| SPAD                     | 49 ±0.6   | 50 ±0.5   | <i>ns</i> | 64 ±0.5   | 56 ±0.4   | <b>c</b>  | 62 ±1.1   | 57 ±0.5   | <b>b</b>  | 65 ±0.9   | 57 ±0.6   | <b>c</b>  |

Lowercase letters indicate significantly different means between the two lines at  $p \leq 0.05^a$ ,  $p \leq 0.01^b$ , or  $p \leq 0.001^c$ . Abbreviations: MS LN, Main Stem Leaf Number; MS LA, Main Stem Leaf Area; tLL, top Leaf Length; mLL, middle Leaf Length; bLL, base Leaf Length; tLW, top Leaf Width; mLW, middle Leaf Width; bLW, base Leaf Width; TN, Tiller Number; SPAD is a relative measure of chlorophyll; ns, not significant
