# Supplementary material for: Sucrose accumulation in sweet sorghum stems occurs by apoplasmic phloem unloading and does not involve differential Sucrose transporter expression
Source: PubMed Central journal article supplement (PMC4518677; doi:10.1186/s12870-015-0572-8), 2015-07-30

Additional file 2: Figure S1

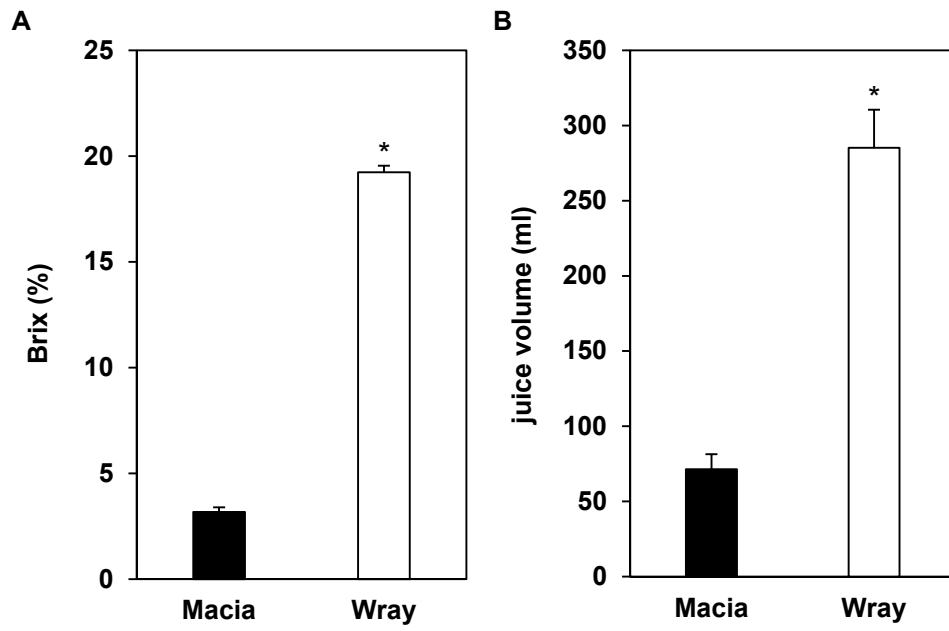

Supplement: 12870_2015_572_MOESM2_ESM.pdf [file 12870_2015_572_MOESM2_ESM.pdf]
