# Supplementary material for: Sucrose accumulation in sweet sorghum stems occurs by apoplasmic phloem unloading and does not involve differential Sucrose transporter expression
Source: PubMed Central journal article supplement (PMC4518677; doi:10.1186/s12870-015-0572-8), 2015-07-30
Supplement: 12870_2015_572_MOESM4_ESM.pdf [file 12870_2015_572_MOESM4_ESM.pdf]

**Additional file 4: Table S2. Average Cq values  $\pm$  SE for each *SbSUT* gene.**

|               | <b>Leaf</b>     |                 | <b>Stem</b>     |                 |
|---------------|-----------------|-----------------|-----------------|-----------------|
|               | <b>Macia</b>    | <b>Wray</b>     | <b>Macia</b>    | <b>Wray</b>     |
| <i>SbSUT1</i> | 26.9 $\pm$ 0.17 | 27.2 $\pm$ 0.15 | 27.9 $\pm$ 0.13 | 28.2 $\pm$ 0.17 |
| <i>SbSUT2</i> | 27.6 $\pm$ 0.1  | 26.8 $\pm$ 0.07 | 26.2 $\pm$ 0.09 | 25.8 $\pm$ 0.07 |
| <i>SbSUT3</i> | 31.6 $\pm$ 0.06 | 31.7 $\pm$ 0.09 | 31.8 $\pm$ 0.13 | 33.1 $\pm$ 0.13 |
| <i>SbSUT4</i> | 30.0 $\pm$ 0.09 | 29.6 $\pm$ 0.07 | 29.3 $\pm$ 0.07 | 29.8 $\pm$ 0.08 |
| <i>SbSUT5</i> | 31.4 $\pm$ 0.08 | 31.5 $\pm$ 0.14 | 31.5 $\pm$ 0.15 | 33.0 $\pm$ 0.19 |
| <i>SbSUT6</i> | 32.1 $\pm$ 0.08 | 32.1 $\pm$ 0.08 | 32.0 $\pm$ 0.14 | 33.2 $\pm$ 0.14 |
