# Supplementary material for: Sucrose accumulation in sweet sorghum stems occurs by apoplasmic phloem unloading and does not involve differential Sucrose transporter expression
Source: PubMed Central journal article supplement (PMC4518677; doi:10.1186/s12870-015-0572-8), 2015-07-30
Supplement: 12870_2015_572_MOESM7_ESM.pdf [file 12870_2015_572_MOESM7_ESM.pdf]

**Additional file 7: Table S3. Chlorophyll fluorescence (Fv/Fm) measured on dark adapted leaves of Macia and Wray field-grown plants.**

| <b>Cultivar</b> | <b>Fv/Fm</b> | <b>SE</b> | <b>p-value</b> |
|-----------------|--------------|-----------|----------------|
| Macia           | 0.794        | 0.002     | 0.753          |
| Wray            | 0.795        | 0.003     |                |

Measurements were taken 56 days after planting on N = 5. No statistical differences were detected between the two cultivars.
