# Supplementary material for: Sucrose accumulation in sweet sorghum stems occurs by apoplasmic phloem unloading and does not involve differential Sucrose transporter expression
Source: PubMed Central journal article supplement (PMC4518677; doi:10.1186/s12870-015-0572-8), 2015-07-30
Supplement: 12870_2015_572_MOESM8_ESM.pdf [file 12870_2015_572_MOESM8_ESM.pdf]

**Additional file 8: Table S4.** List of PCR primer sets used in the qRT-PCR analyses.

| <b>Phytozome reference no.</b> | <b>Gene ID.</b> | <b>Primer name</b>                | <b>Primer sequence (5' - 3')</b> | <b>Product size (bp)</b> |
|--------------------------------|-----------------|-----------------------------------|----------------------------------|--------------------------|
| Sobic.001G488700               | Sb01g045720     | SbSUT1-3 F                        | ATGCCATCCGTTCTTCTCGT             | 124                      |
| Sobic.001G488700               | Sb01g045720     | SbSUT1-3 R                        | TCTGAGCATTGGTGCCCTTT             | 124                      |
| Sobic.008G193300               | Sb08g023310     | SbSUT2-2 F                        | TGCAATGGCTGCTAGTCGTGTT           | 145                      |
| Sobic.008G193300               | Sb08g023310     | SbSUT2-2 R                        | TGCATTTCCACCGCCGAACATT           | 145                      |
| Sobic.001G254000               | Sb01g022430     | SbSUT3-2 F                        | TTCCCGTTCCTGCAGACCAA             | 110                      |
| Sobic.001G254000               | Sb01g022430     | SbSUT3-2 R                        | AAGATCATGGTCACCACCGT             | 110                      |
| Sobic.004G353600               | Sb04g038030     | SbSUT4-2 F                        | ATGGAAACAACGTGTCCGGCT            | 102                      |
| Sobic.004G353600               | Sb04g038030     | SbSUT4-2 R                        | AAACTGCTCCAGGTCCATCA             | 102                      |
| Sobic.004G190500               | Sb04g023860     | SbSUT5-MF<br>(Milne et al., 2013) | CCCGTAGTGTTGCGGAGTC              | 119                      |
| Sobic.004G190500               | Sb04g023860     | SbSUT5-MR<br>(Milne et al., 2013) | CCAATGGATCGGAAAATAAAG            | 119                      |
| Sobic.007G214500               | Sb07g028120     | SbSUT6-1 F                        | CTCCTCTTCTGCTCCGTCGC             | 108                      |
| Sobic.007G214500               | Sb07g028120     | SbSUT6-1 R                        | GAACACCATGAGGTTGCTGA             | 108                      |
| pSP64poly(A)-luc               | n/a             | Luc-F                             | CCAGGGATTTTCAGTGGATGT            | 183                      |
| pSP64poly(A)-luc               | n/a             | Luc-R                             | AATCTGACGCAGGCAGTTCT             | 183                      |
